# Supplementary material for: Influence of the pH on the synthesis of reduced graphene oxide under hydrothermal conditions
Source: Royal Society of Chemistry journal article supplement (doi:10.1039/c2nr30605k), 2012-01-01

## Supporting Information

### Influence of the pH on the Synthesis of reduced Graphene Oxide under Hydrothermal Conditions

Concha Bosch-Navarro<sup>a</sup>, Eugenio Coronado<sup>a,\*</sup>, Carlos Martí-Gastaldo<sup>a,b,\*</sup>, J. F. Sánchez-Royo<sup>c</sup>  
and Maribel Gómez Gómez<sup>c</sup>

<sup>a</sup> Instituto de Ciencia Molecular (ICMol), Universidad de Valencia, Catedrático José Beltrán-2, 46980 Paterna (Spain). E-mail: [eugenio.coronado@uv.es](mailto:eugenio.coronado@uv.es)

<sup>b</sup> Department of Chemistry, University of Liverpool, Crown Street, L697ZD, Liverpool (United Kingdom).; E-mail: [gastaldo@liverpool.ac.uk](mailto:gastaldo@liverpool.ac.uk)

<sup>c</sup> Universidad de Valencia (ICMUV), c/ Dr. Moliner 50, 46100 Burjassot (Spain)

#### Table of Contents

**SI 1.** FT-IR spectra of GO and the rGO samples

**SI 2.** XRD diffraction powder of graphite, GO and rGO at pH 3, 7 and 11.

**SI 3.** Additional HR-TEM of rGO samples obtained at the different pHs.

**SI 4.** SEM images of rGO samples obtained at the different pHs

**SI 5.** Representation of  $I_{C-C}/I_{C-O}$  values extracted from the XPS measurements versus  $I_G/I_D$  values extracted for the Raman spectra for GO and the different rGO samples.

**SI 6.** Second order Raman spectra of GO and the rGO samples showing the 2D band

**SI 7.** Microanalysis performed over the rGO samples at pH 7, 9 and 11

**SI 1:** (a) FT-IR spectra of GO (blue) and rGO at pH3 (green), pH5 (orange), pH7 (red), pH9 (black) and pH11 (pink); (b and c) zoom-in of the 3800-3000 $\text{cm}^{-1}$  and 1800-1300 $\text{cm}^{-1}$  regions, respectively.

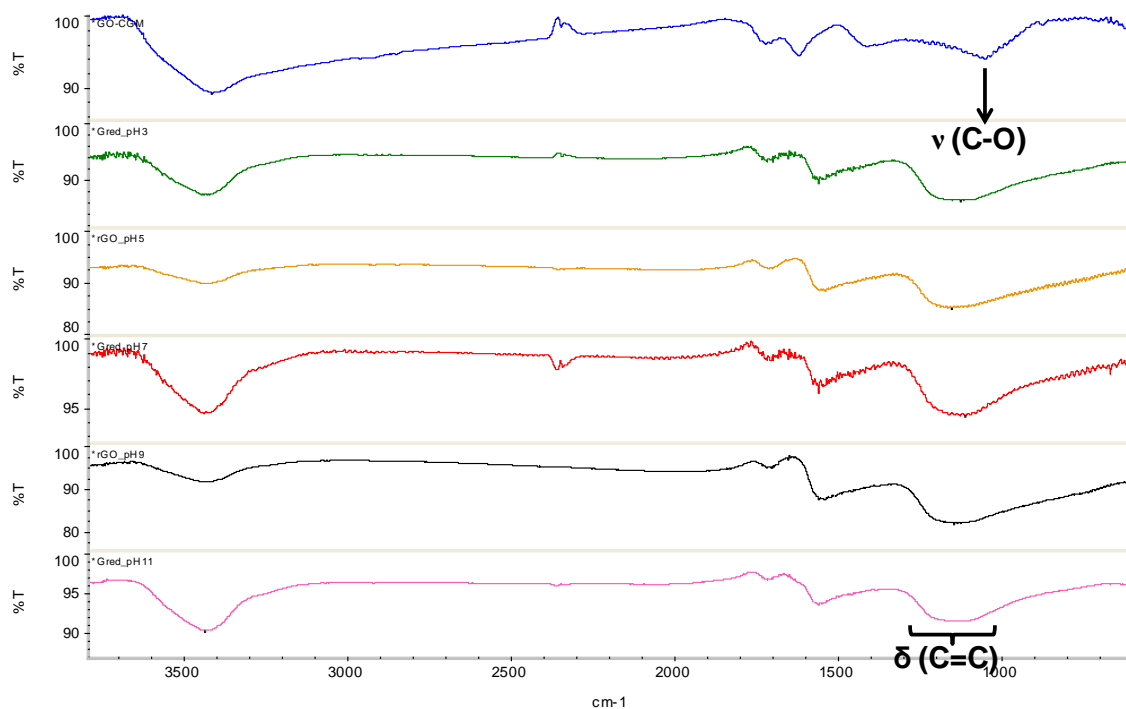

(a)

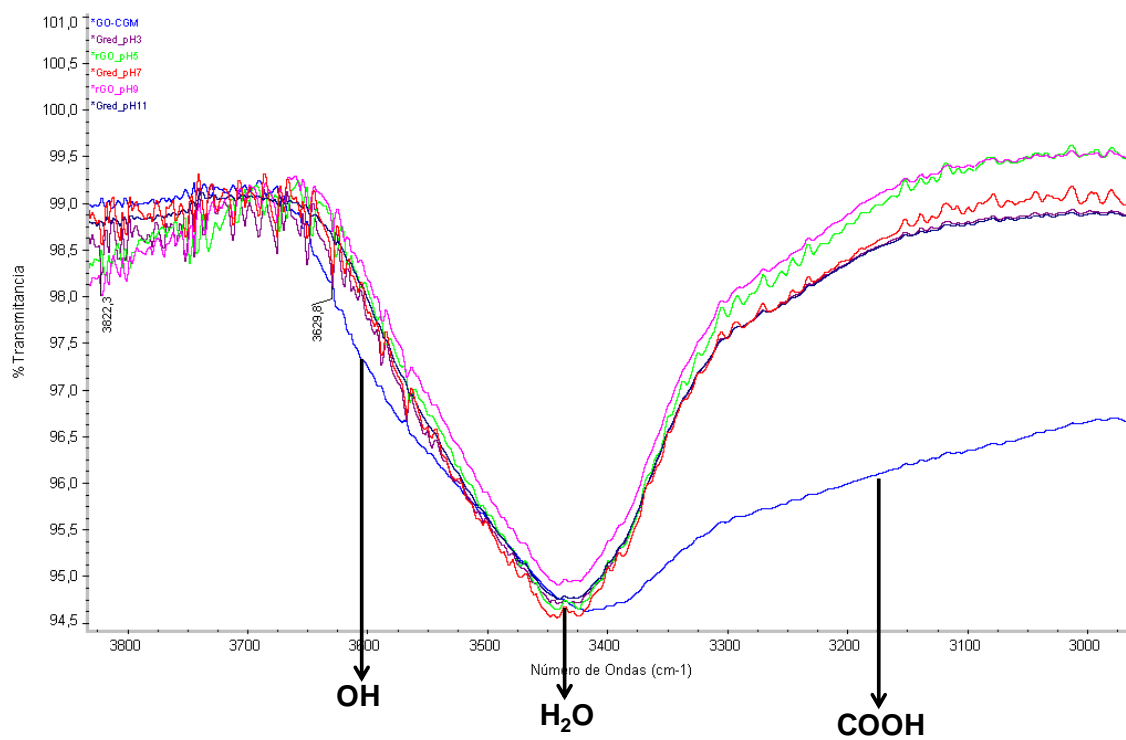

(b)

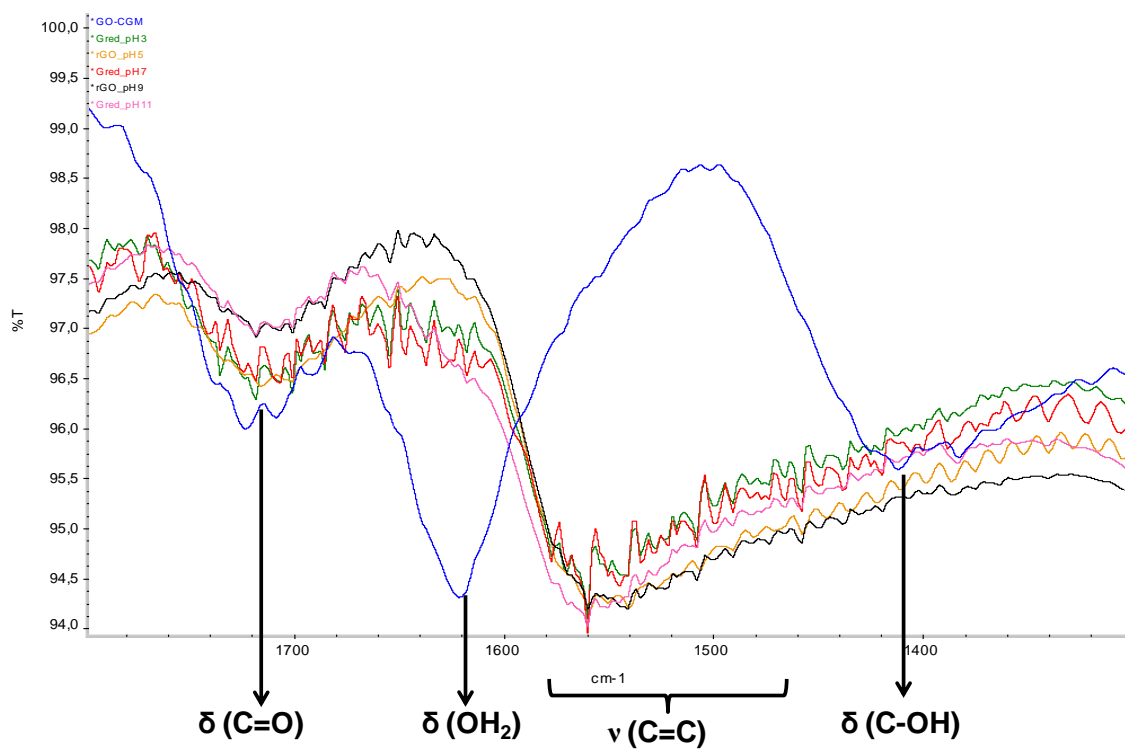

(c)

**SI 2.** XRD diffraction powder of graphite (grey), GO (blue), rGO pH3 (green), rGO pH7 (red) and rGO pH11 (pink). The materials obtained at pH = 5 and 9 exhibit equivalent PXRD patterns with no significant peak broadening.

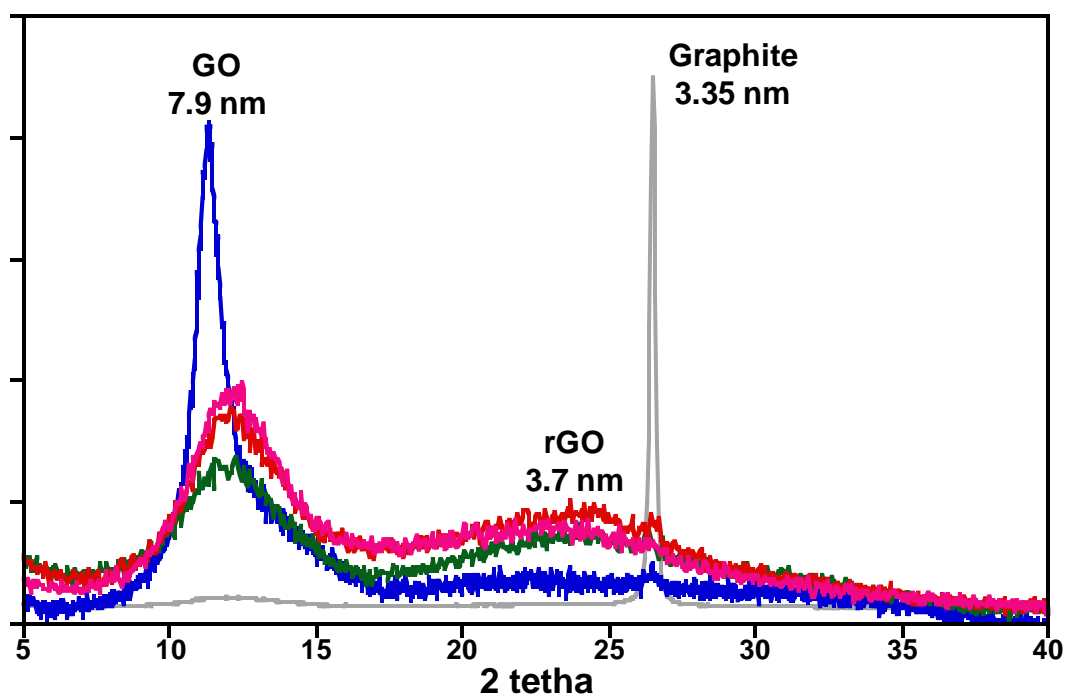

**SI 3.** Additional HR-TEM of rGO at (i) pH3, (ii) pH5, (iii) pH7, (iv) pH9, (v) pH11.

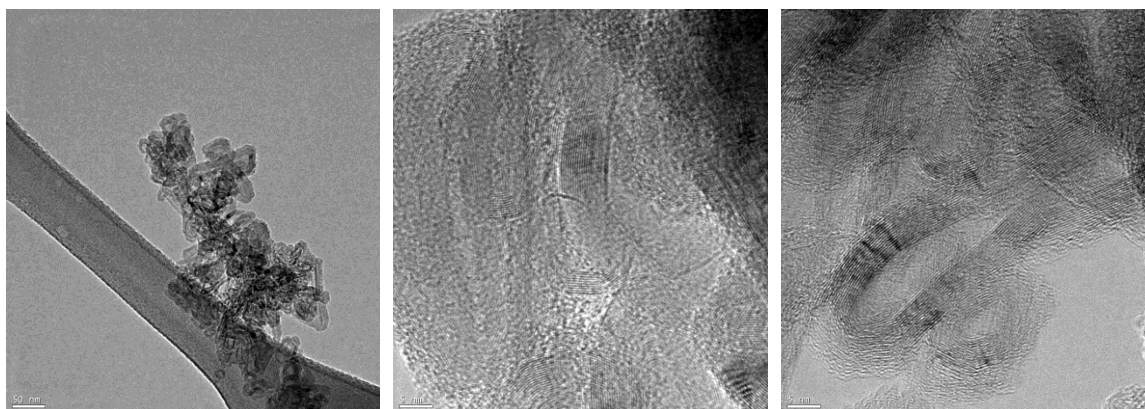

a

b

c

(i) pH3

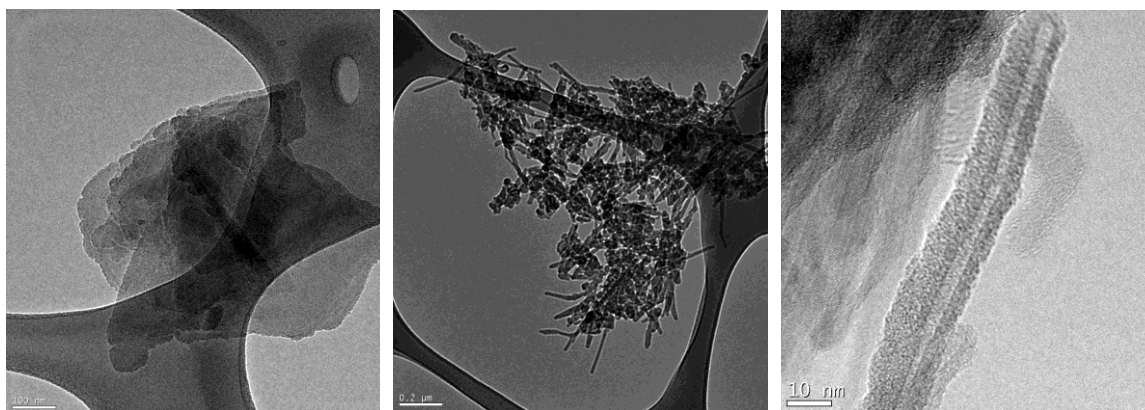

a

b

c

(ii) pH5

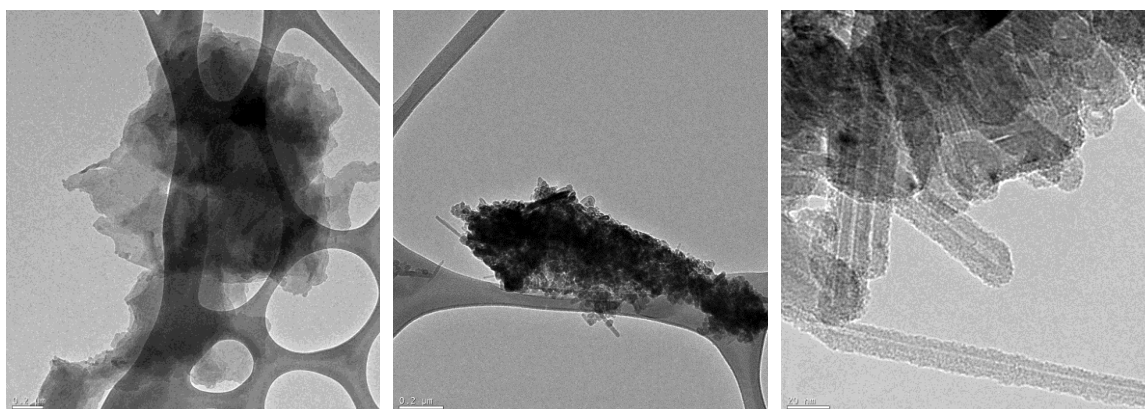

a

b

c

(iii) pH7

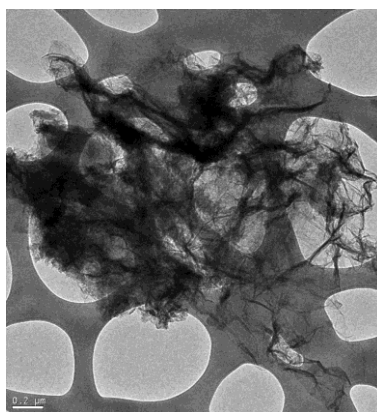

a

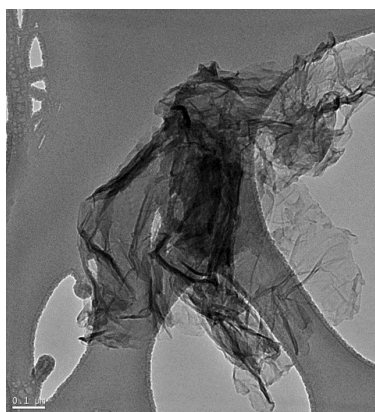

b

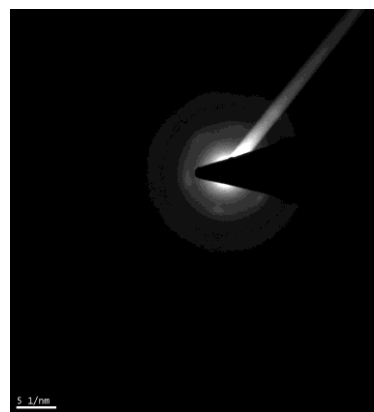

c

(iv) pH9

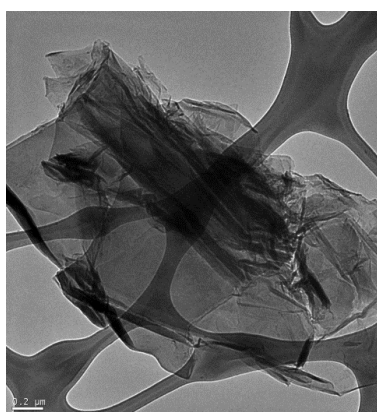

a

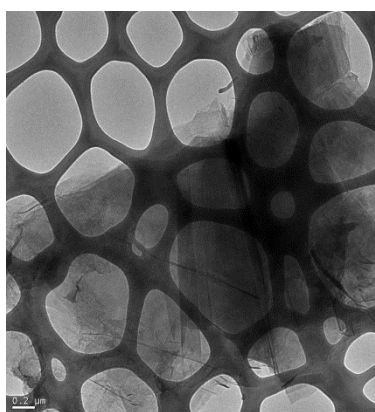

b

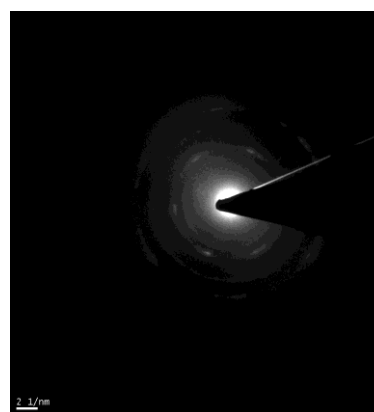

c

(v) pH11



**SI 4.** SEM images extracted from rGO samples at the different pHs showing morphologies comparable to those reported in the literature for other rGO materials obtained from the reduction of GO.<sup>1</sup>

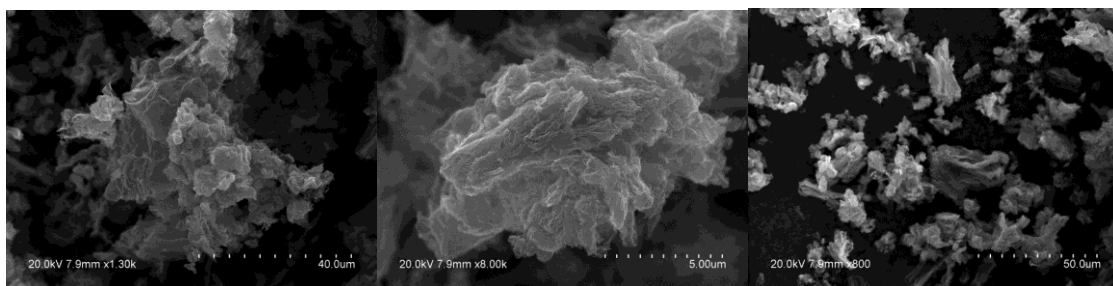

pH 3

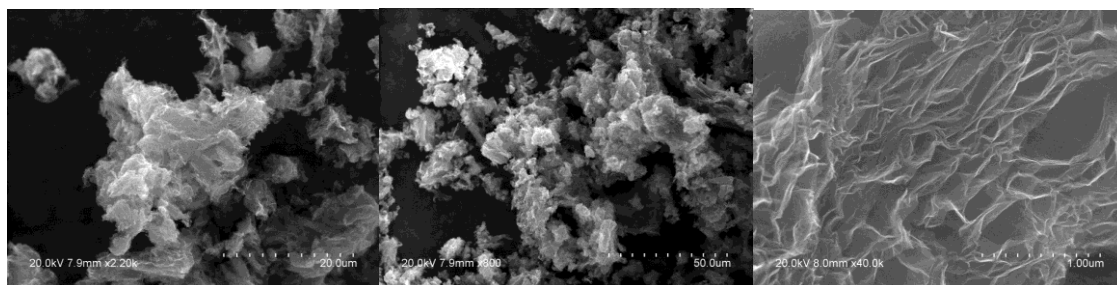

pH 5

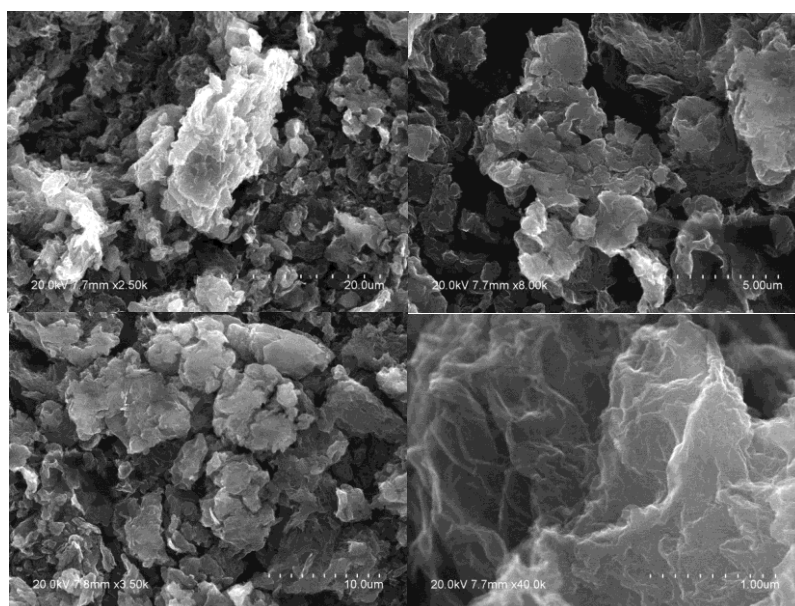

pH 7

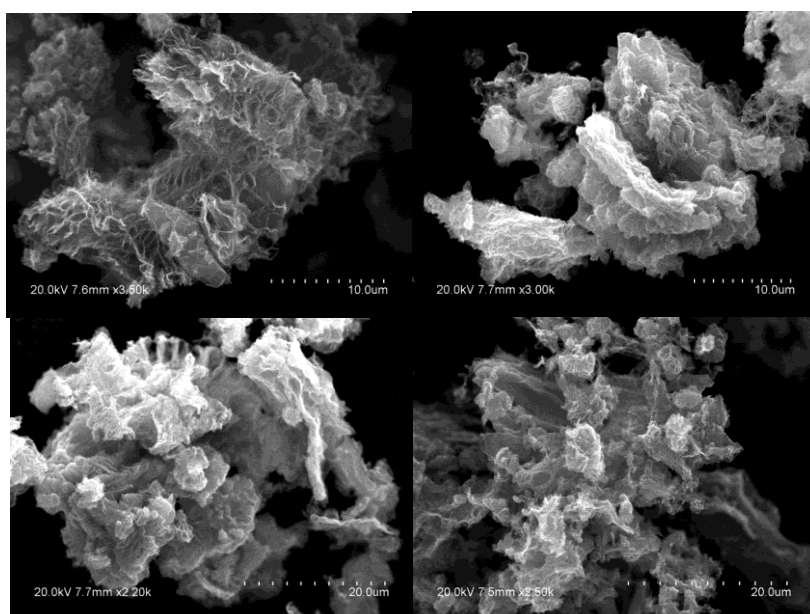

pH 9

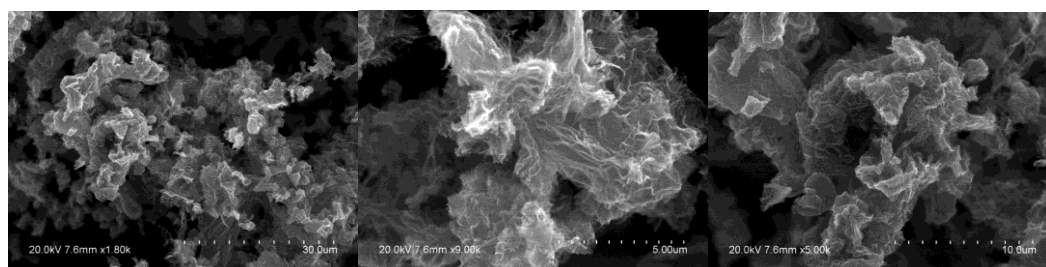

pH 11

---

<sup>i</sup> a) S. Park, J. An, J. R. Potts, A. Velamakanni, S.Murali, R. S. Ruoff, *Carbon*, 2011, **49**, 3019. b) C. Nethravathi, M. Rajamathi, *Carbon*, 2008, **46**, 1994.



**SI 5.** Representation of the  $I_{C-C}/I_{C-O}$  values as extracted from the XPS measurements (blue circles), versus  $I_G/I_D$  values extracted for the Raman spectra (green triangles) for GO and the different rGO samples. The solid line is just a guide to the eye.

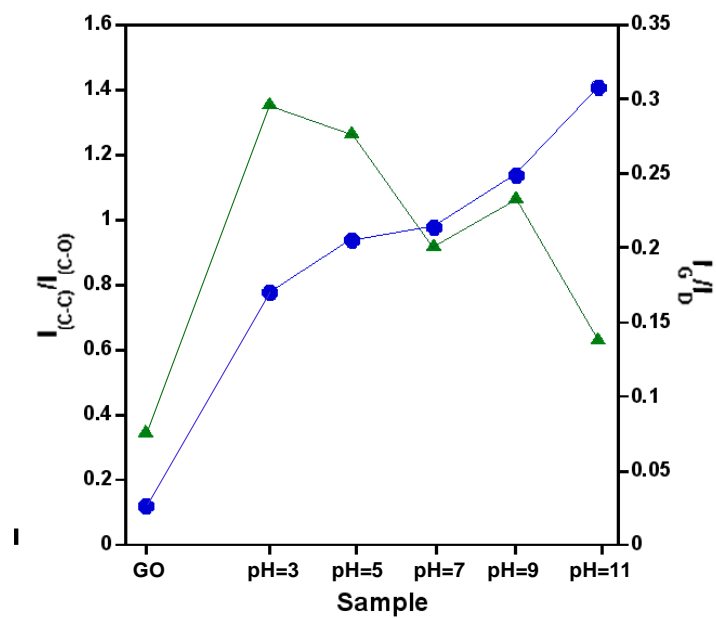

**SI 6.** Second order Raman spectra of the starting GO and the rGO samples showing the  
2D band

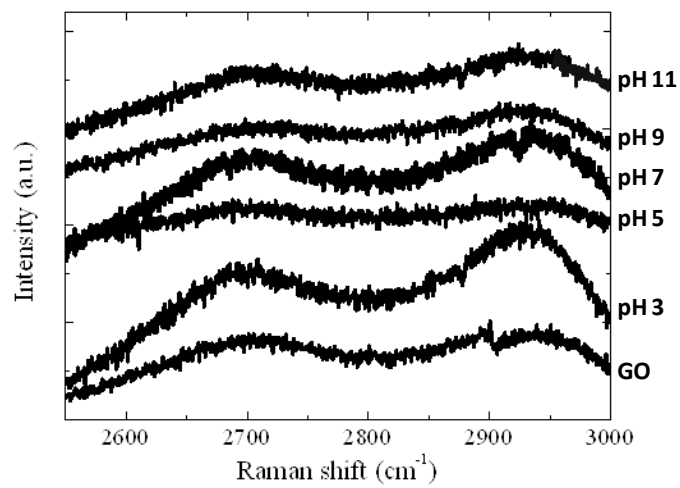

**SI 7.** Microanalysis performed over the rGO samples at pH 7, 9 and 11. On the basis of the Electron Probe Microanalysis (EPMA), the samples are composed at least in a 99.7 %wt of oxygen and carbon, and just a 0.3 %wt of the mass could be assigned to residual sodium that comes from the experimental procedure.

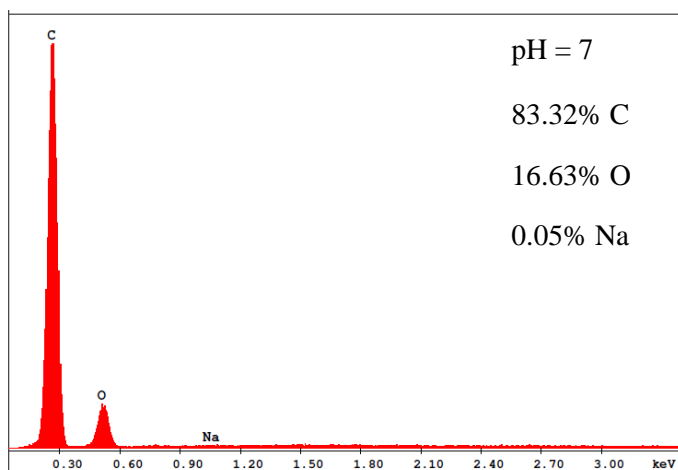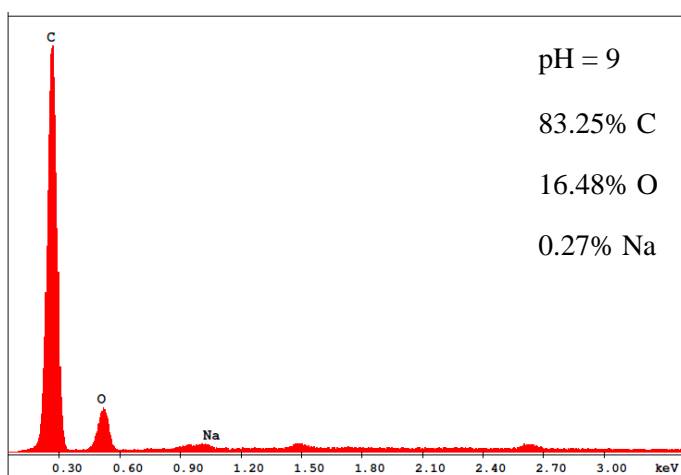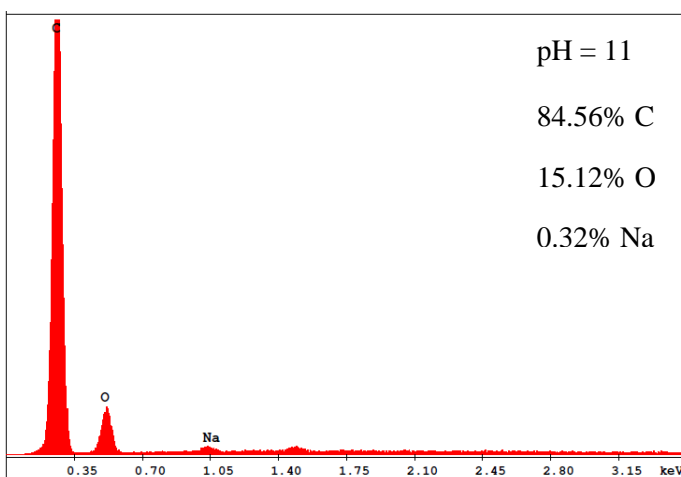

Supplement: c2nr30605k.pdf [file c2nr30605k.pdf]
